# Supplementary material for: Recyclable Fe3O4/MWCNT/CNF composite nanopaper as an advanced negative electrode for flexible asymmetric supercapacitors
Source: Royal Society of Chemistry journal article supplement (doi:10.1039/d3ta04295b), 2023-01-01
Supplement: d3ta04295b1.pdf [file d3ta04295b1.pdf]

## Supporting Information

### **Recyclable Fe<sub>3</sub>O<sub>4</sub>/MWCNT/CNF Composite Nanopaper as an Advanced Negative Electrode for Flexibility Asymmetric Supercapacitors**

Haoran Zhao <sup>a</sup>, Haidong Jin<sup>a</sup>, Shenghui Li<sup>a</sup>, Yahui Dong <sup>a</sup>, Shipeng Wang <sup>a</sup>, Qian Cheng<sup>a,\*</sup>, Yu Li <sup>b,\*</sup>

<sup>a</sup> *Key Laboratory of Bio-based Material Science & Technology(Ministry of Education), College of  
Material Science and Engineering, Northeast Forestry University, Harbin 150040, China*

<sup>b</sup> *College of Science, Northeast Forestry University, Harbin 150040,China*

\*Corresponding author. *E-mail addresses:* [chengqian66@163.com](mailto:chengqian66@163.com)(Q. Cheng)

[liyu87043@163.com](mailto:liyu87043@163.com) (Y. Li)

## Figure Content

### Calculation methods

- Table S1.** The raw materials ratio of the NFT@Fe-xyz nanopapers
- Fig. S1** TEM images of MWCNT@Fe<sub>3</sub>O<sub>4</sub> (the inset shows the size distribution of Fe<sub>3</sub>O<sub>4</sub> nanoparticles)
- Fig. S2(a-f).** Digital photographs of the MWCNT@Fe<sub>3</sub>O<sub>4</sub> composites dispersed in ethanol (left) and CNF (right) standing for (a) 0 s, (b) 20 s, (c) 40 s, (d) 80 s, (e) 120 s, and (f) 25 d
- Fig. S3(a-f).** Digital photographs of MWCNT@Fe<sub>3</sub>O<sub>4</sub> composites dispersed in ethanol (left) and CNF (right) at sides of the magnet after (a) 0, (b) 1, (c) 2, (d) 3, (e) 4, and (f) 5 s.
- Fig. S4.** The zeta potential of CNF, MWCNT, MWCNT@Fe<sub>3</sub>O<sub>4</sub>, and NFT@Fe-xyz.
- Fig. S5.** The fracture energy of the NFT and NFT@Fe-xyz.
- Fig. S6.** The EDS spectrum of the NFT@Fe-712 composite nanopaper.
- Fig. S7.** N<sub>2</sub> adsorption–desorption isotherms and corresponding BJH pore-size distribution curves (inset) of the NFT@Fe-712 and NFT
- Table S2.** Comparison of the reported Fe<sub>3</sub>O<sub>4</sub>-based electrode and flexible cellulose-based electrodes
- Fig. S8(a-i).** The CV curves of (a) NFT@Fe-622, (b) NFT@Fe-532, (c) NFT@Fe-442, and (d) NFT@Fe-802 at different scan rates and the capacitive contributions at 5 mV s<sup>-1</sup> of (e) NFT@Fe-802, (f) NFT@Fe-712, (g) NFT@Fe-622, (h) NFT@Fe-532, and (i) NFT@Fe-442.

**Fig. S9(a-f).** The GCD curves of (a) NFT@Fe-802, (b) NFT@Fe-622, (c) NFT@Fe-532 and (d) NFT@Fe-442 at different current densities; (e) the variation in the specific capacitance of the NFT@Fe-xyz nanopaper samples at different current densities; (f) long-term cycling performance of the NFT@Fe-712 at a current density of  $5 \text{ A g}^{-1}$  (inset shows the GCD curves of the last 10 cycles).

**Fig. S10.** (a) SEM images, (b) elemental mapping of C, O, Fe, S, and (c) XRD of NFT@Fe-712 after long-term cycling

**Table S3.** Equivalent series resistance of the NFT@Fe-xyz nanopaper samples

**References**

## Calculation methods

Specific capacitance ( $C_p$ , F g<sup>-1</sup>) with respect to a single electrode was calculated using CV profiles at different scan rates.

$$C_p = \frac{\int I dv}{2\nu m \Delta V} \#(S1)$$

Where,  $\int I dv$  is the area under CV curve,  $\nu$  is the potential scan rate (V s<sup>-1</sup>),  $m$  (g) is the mass of electrode and  $\Delta V$  (V) is the potential window.

The mass capacitance of single electrode was estimated from the GCD curves at different current density using equations:

$$C_p = \frac{I \Delta t}{m \Delta V} \#(S2)$$

Where  $I$  (A) is the discharge current,  $\Delta t$  (s) is the discharge time for potential window  $\Delta V$  (V) and  $m$  (g) is the mass of electrode. To calculate areal capacitance,  $m$  (g) has been replaced with electrode area  $A$  (cm<sup>2</sup>).

To identify the combined characteristics of electrochemical capacitive and diffusion controlled processes of NFT@Fe, the relationship of current density ( $i$ ) and corresponding the scan rate ( $\nu$ ) can be evaluated the following equation:

$$i = a\nu^b \#(S3)$$

$$\log(i) = b \log(\nu) + \log(a) \#(S4)$$

Where,  $a$  and  $b$  present constants. The linear relationship between  $\log(i)$  and  $\log(\nu)$  can provide the value of  $b$ , which is an important indicator for evaluating the kinetics of redox reaction.

The dependence of voltametric current on scan rate from CV was used to calculate the capacitance proportion.

$$i(V) = K_1 v + K_2 v^{1/2} \#(S5)$$

$$\frac{i(V)}{v^{1/2}} = K_1 v^{1/2} + K_2 \#(S6)$$

Where,  $i$  represents a current density at the potential of  $V$ ,  $K_1 v$  and  $K_2 v^{1/2}$  are the current contribute in capacitive-controlled and diffusion-controlled processes.

For a flexible asymmetric supercapacitor, charge balance between positive and negative electrodes follows equations:

$$Q^+ = Q^- \#(S7)$$

$$Q^+ = C_p^+ \Delta V m^+ \#(S8)$$

$$Q^- = C_p^- \Delta V m^- \#(S9)$$

In which  $Q^+$  and  $Q^-$  are the charge stored in positive and negative electrode,  $\Delta V$  is the voltage window during the charge and discharge process.  $m^+$  and  $m^-$  are the mass of positive and negative electrode, respectively.

$C_p$  (F g<sup>-1</sup>), energy density ( $E$ , Wh kg<sup>-1</sup>) and power density ( $P$ , W kg<sup>-1</sup>) of ASC were evaluated using following equations:

$$E = \frac{0.5 C_p \Delta V^2}{3.6} \#(S10)$$

$$P = \frac{3600 E}{\Delta t} \#(S11)$$

**Table S1.** The raw materials ratio of the NFT@Fe-xyz nanopapers

| Sample      | MWCNT@Fe <sub>3</sub> O <sub>4</sub> /mg | MWCNT /mg | CNF /mg | Mass ratio |
|-------------|------------------------------------------|-----------|---------|------------|
| NFT@Fe-505  | 20                                       | 0         | 20      | 5:0:5      |
| NFT@Fe-604  | 24                                       | 0         | 16      | 6:0:4      |
| NFT@Fe-703  | 28                                       | 0         | 12      | 7:0:3      |
| NFT@ Fe-802 | 32                                       | 0         | 8       | 8:0:2      |
| NFT@ Fe-901 | 36                                       | 0         | 4       | 9:0:1      |
| NFT@ Fe-712 | 28                                       | 4         | 8       | 7:1:2      |
| NFT@ Fe-622 | 24                                       | 8         | 8       | 6:2:2      |
| NFT@ Fe-532 | 20                                       | 12        | 8       | 5:3:2      |
| NFT@ Fe-442 | 16                                       | 16        | 8       | 4:4:2      |
| NFT         | 0                                        | 32        | 8       | 0:8:2      |

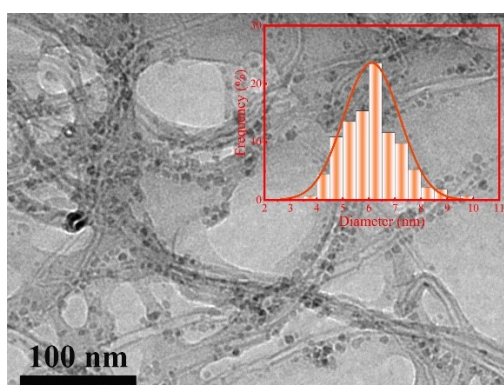

**Fig. S1.** TEM images of MWCNT@Fe<sub>3</sub>O<sub>4</sub> (the inset shows the size distribution of Fe<sub>3</sub>O<sub>4</sub> nanoparticles)

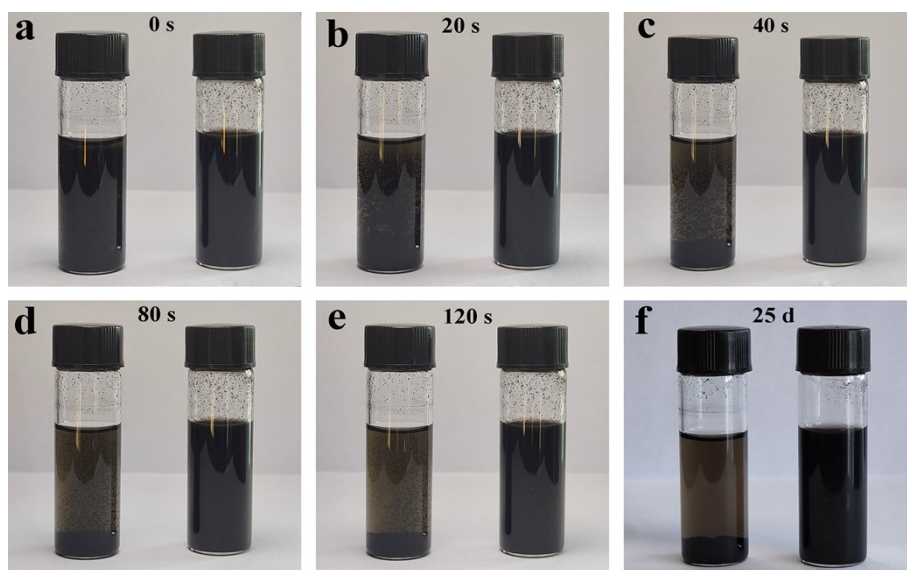

**Fig. S2.** Digital photographs of the MWCNT@Fe<sub>3</sub>O<sub>4</sub> composites dispersed in ethanol (left) and CNF (right) standing for (a) 0 s, (b) 20 s, (c) 40 s, (d) 80 s, (e) 120 s, and (f) 25 d

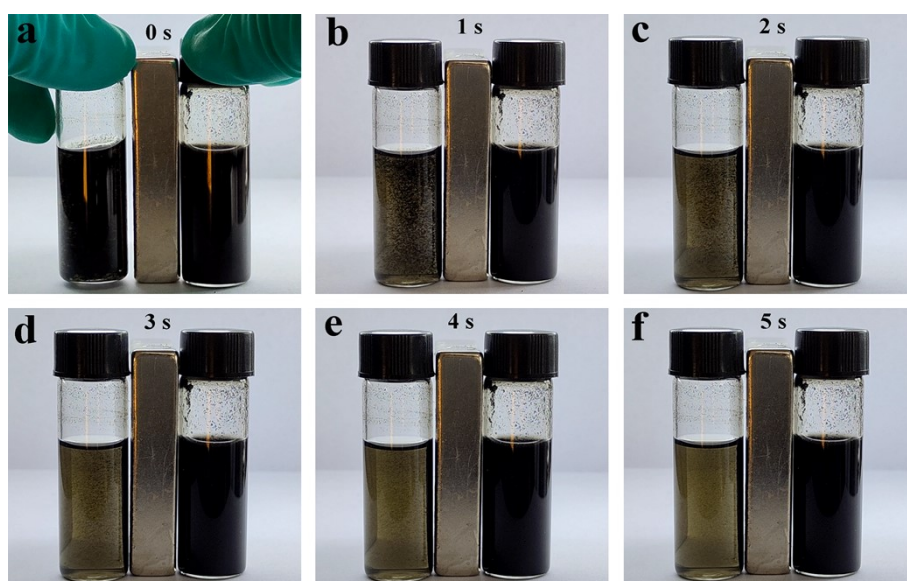

**Fig. S3.** Digital photographs of MWCNT@Fe<sub>3</sub>O<sub>4</sub> composites dispersed in ethanol (left) and CNF (right) at sides of the magnet after (a) 0, (b) 1, (c) 2, (d) 3, (e) 4, and (f) 5 s.

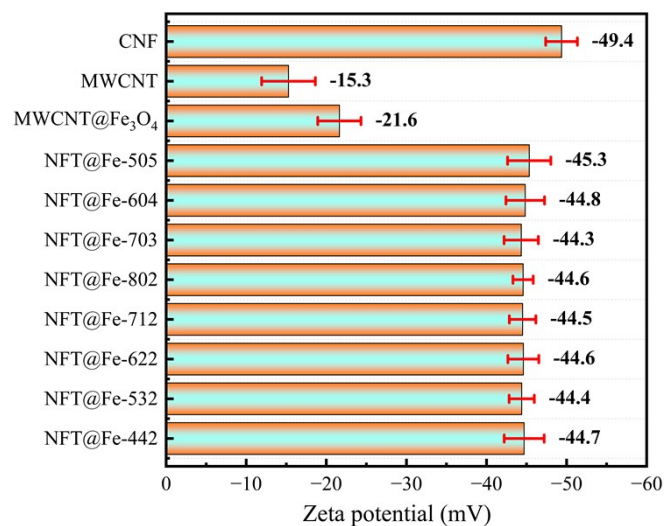

**Fig. S4.** The zeta potential of CNF, MWCNT, MWCNT@Fe<sub>3</sub>O<sub>4</sub>, and NFT@Fe-xyz.

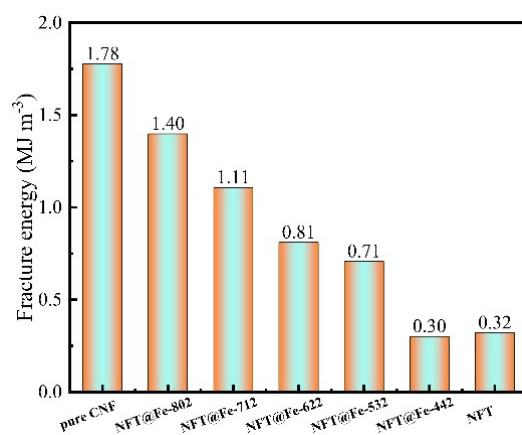

**Fig. S5.** The fracture energy of the NFT and NFT@Fe-xyz.



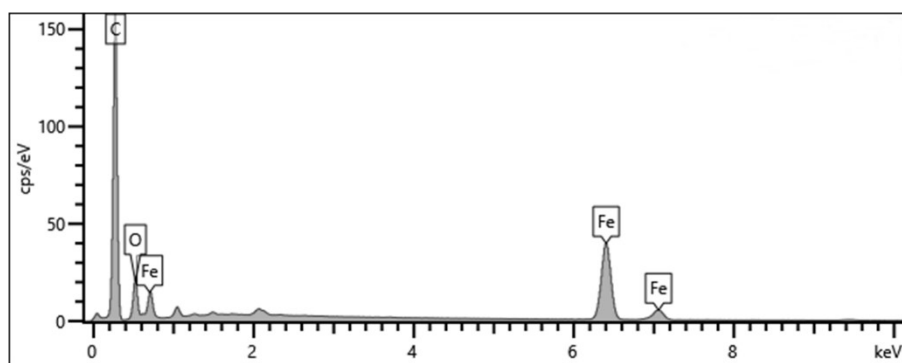

**Fig. S6.** The EDS spectrum of the NFT@Fe-712 composite nanopaper.

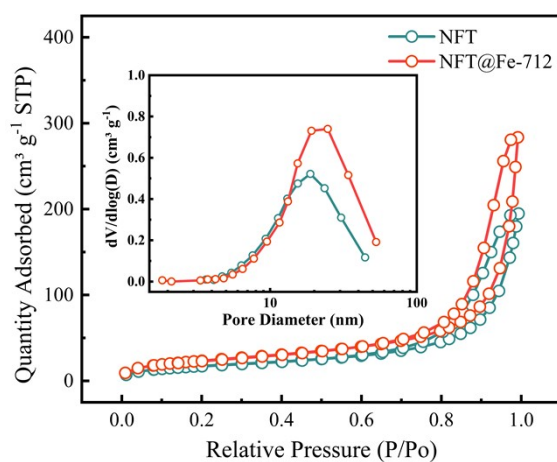

**Fig. S7.** N<sub>2</sub> adsorption–desorption isotherms and corresponding BJH pore-size distribution curves (inset) of the NFT@Fe-712 and NFT

**Table S2.** Comparison of the reported Fe<sub>3</sub>O<sub>4</sub>-based electrode and flexible cellulose-based electrodes

| Materials                                                      | Specific capacitance                                     | Scan rate (mV s <sup>-1</sup> ) | Current density       | Reference |
|----------------------------------------------------------------|----------------------------------------------------------|---------------------------------|-----------------------|-----------|
| Fe <sub>3</sub> O <sub>4</sub> -rGO                            | 270 F g <sup>-1</sup>                                    | 5                               | -                     | 1         |
| Fe <sub>3</sub> O <sub>4</sub> @Fe <sub>2</sub> O <sub>3</sub> | 231.9 F g <sup>-1</sup>                                  | 5                               | -                     | 2         |
| NCS@Fe <sub>3</sub> O <sub>4</sub>                             | 206 F g <sup>-1</sup>                                    | -                               | 1 A g <sup>-1</sup>   | 3         |
| Fe <sub>3</sub> O <sub>4</sub> /Carbon Nanofiber               | 135 F g <sup>-1</sup>                                    | 5                               | -                     | 4         |
| Fe <sub>3</sub> O <sub>4</sub> -C                              | 102 F g <sup>-1</sup>                                    | 5                               | -                     | 5         |
| CNF/MWCNT/RGO/Fe <sub>3</sub> O <sub>4</sub>                   | 169.3 F g <sup>-1</sup>                                  | -                               | 1 mA cm <sup>-2</sup> | 6         |
| CNF/porous Co <sub>3</sub> O <sub>4</sub>                      | 594.8 mF cm <sup>-2</sup>                                | 5                               | -                     | 7         |
| PH-MWCNT(90-10 wt%)                                            | 121 mF cm <sup>-2</sup>                                  | 5                               | -                     | 8         |
| CNF/MWCNT aerogel                                              | 114.8 F g <sup>-1</sup>                                  | 10                              | -                     | 9         |
| CNF/CNT/RGO-3                                                  | 116.3 F g <sup>-1</sup>                                  | -                               | 0.1 A g <sup>-1</sup> | 10        |
| FWCNT/CNF buckypaper                                           | 167.6 F g <sup>-1</sup>                                  | 5                               | -                     | 11        |
| RGO/CNC                                                        | 176.7 F g <sup>-1</sup><br>(4.42 mF cm <sup>-2</sup> )   | -                               | 0.5 A g <sup>-1</sup> | 12        |
| NFT@Fe-712                                                     | 229.9 F g <sup>-1</sup><br>(735.68 mF cm <sup>-2</sup> ) | 5                               | -                     | This work |
|                                                                | 210.8 F g <sup>-1</sup><br>(674.56 mF cm <sup>-2</sup> ) | -                               | 0.5 A g <sup>-1</sup> | This work |

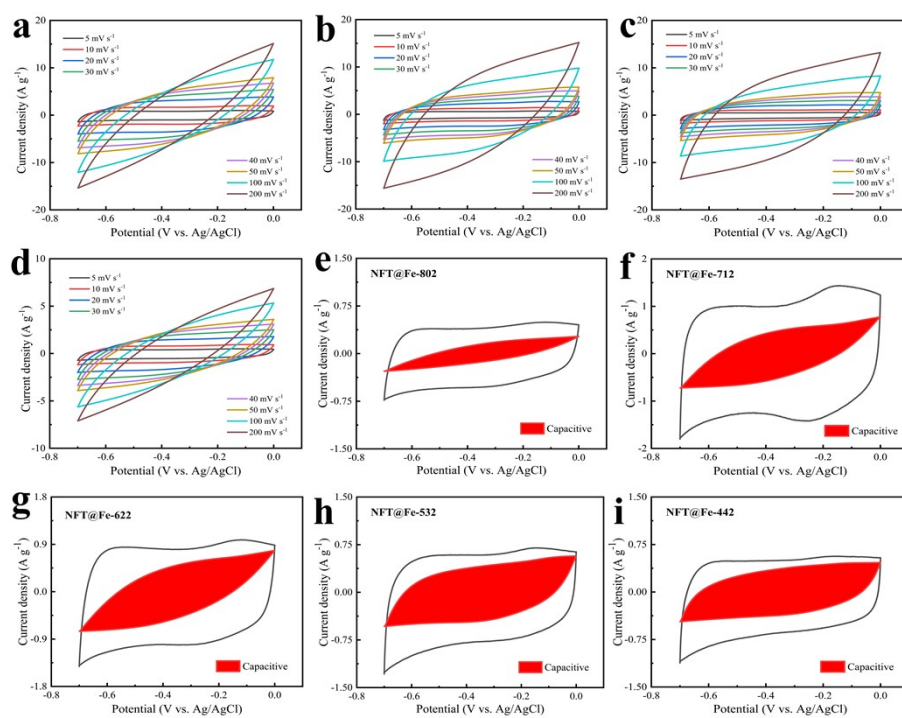

**Fig. S8.** The CV curves of (a) NFT@Fe-622, (b) NFT@Fe-532, (c) NFT@Fe-442, and (d) NFT@Fe-802 at different scan rates and the capacitive contributions at  $5 \text{ mV s}^{-1}$  of (e) NFT@Fe-802, (f) NFT@Fe-712, (g) NFT@Fe-622, (h) NFT@Fe-532, and (i) NFT@Fe-442.

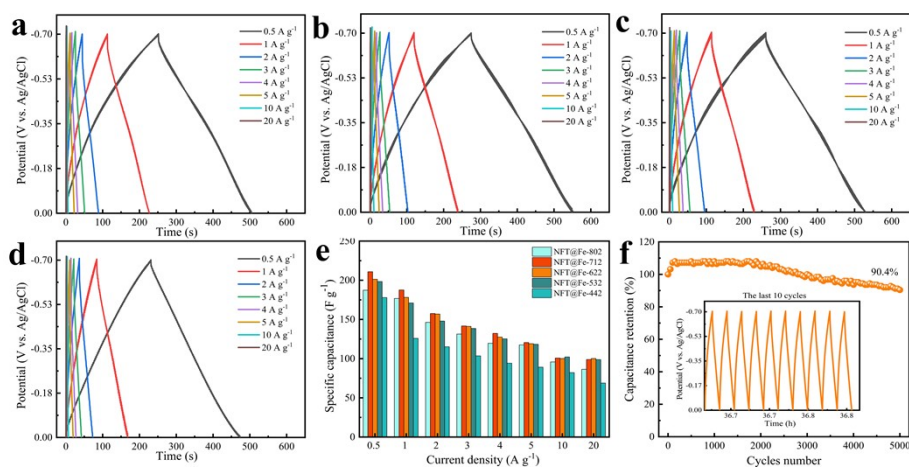

**Fig. S9.** The GCD curves of (a) NFT@Fe-802, (b) NFT@Fe-622, (c) NFT@Fe-532 and (d) NFT@Fe-442 at different current densities; (e) the variation in the specific capacitance of the NFT@Fe-xyz nanopaper samples at different current densities; (f) long-term cycling performance of the NFT@Fe-712 at a current density of  $5 \text{ A g}^{-1}$  (inset shows the GCD curves of the last 10 cycles).

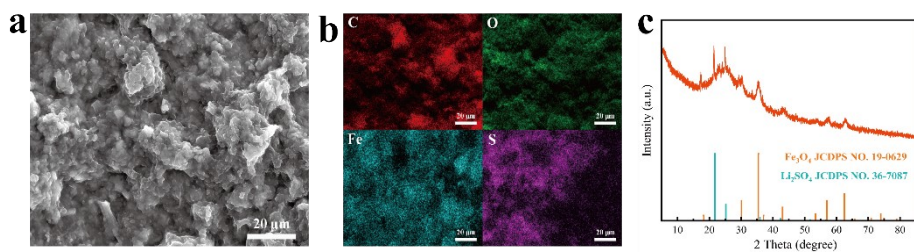

**Fig. S10.** (a) SEM images, (b) elemental mapping of C, O, Fe, S, and (c) XRD of NFT@Fe-712 after long-term cycling

**Table S3.** Equivalent series resistance of the NFT@Fe-xyz nanopaper samples

| Sample     | Solution resistance ( $R_s / \Omega$ ) | Charge transfer resistance ( $R_{ct} / \Omega$ ) | Warburg impedance ( $R_w / \Omega$ ) | Equivalent series Resistance ( $R_{es} / \Omega$ ) |
|------------|----------------------------------------|--------------------------------------------------|--------------------------------------|----------------------------------------------------|
| NFT@Fe-802 | 2.875                                  | 7.105                                            | 7.143                                | 17.123                                             |
| NFT@Fe-712 | 1.828                                  | 3.862                                            | 4.133                                | 9.823                                              |
| NFT@Fe-622 | 1.558                                  | 3.068                                            | 2.019                                | 6.645                                              |
| NFT@Fe-532 | 1.703                                  | 1.775                                            | 2.380                                | 5.858                                              |
| NFT@Fe-442 | 1.486                                  | 1.407                                            | 1.391                                | 4.284                                              |

## Reference

1. T. Qi, J. Jiang, H. Chen, H. Wan, L. Miao and L. Zhang, *Electrochim. Acta*, 2013, **114**, 674-680.
2. X. Tang, R. Jia, T. Zhai and H. Xia, *ACS Appl. Mater. Interfaces*, 2015, **7**, 27518-27525.
3. X. Zhu, D. Hou, H. Tao and M. Li, *J. Alloys Compd.*, 2020, **821**, 153580.
4. J. Mu, B. Chen, Z. Guo, M. Zhang, Z. Zhang, P. Zhang, C. Shao and Y. Liu, *Nanoscale*, 2011, **3**, 5034-5040.
5. L. Li, P. Gao, S. Gai, F. He, Y. Chen, M. Zhang and P. Yang, *Electrochim. Acta*, 2016, **190**, 566-573.
6. L. Xia, X. Li, X. Wu, L. Huang, Y. Liao, Y. Qing, Y. Wu and X. Lu, *J. Mater. Chem. A*, 2018, **6**, 17378-17388.

7. L. Xiao, H. Qi, K. Qu, C. Shi, Y. Cheng, Z. Sun, B. Yuan, Z. Huang, D. Pan and Z. Guo, *Adv. Compos. Hybrid Mater.*, 2021, **4**, 306-316.
8. V.-P. Vu, V.-D. Mai, D. C. T. Nguyen and S.-H. Lee, *ACS Appl. Energy Mater.*, 2022, **5**, 2211-2220.
9. D.-C. Wang, H.-Y. Yu, Z. Ouyang, D. Qi, Y. Zhou, A. Ju, Z. Li and Y. Cao, *Nanoscale*, 2022, **14**, 5163-5173.
10. H. y. Liu, T. Xu, C. y. Cai, K. Liu, W. Liu, M. Zhang, H. s. Du, C. l. Si and K. Zhang, *Adv. Funct. Mater.*, 2022, **32**, 2113082.
11. F. A. Denis, J. Mario Guimarães, C. G. S. Mayara, S. P. Paula, H. R. d. C. Thiago, C. D. Matheus, L. L. Rodrigo and F. R. O. Paulo, *J. Energy Storage*, 2022, **52**, 104848.
12. Z. Ding, Y. Tang and P. Zhu, *Int. J. Biol. Macromol.*, 2022, **200**, 574-582.
